# Supplementary material for: Diffusive Motion of Linear Microgel Assemblies in Solution
Source: Polymers (Basel). 2016 Nov 29;8(12):413. doi: 10.3390/polym8120413 (PMC6432013; doi:10.3390/polym8120413)
Supplement: Supplementary file 1 [file polymers-08-00413-s001.zip]

Archive with 5 entries (5 files):
- Movie1.mpg
- Movie2.mpg
- Movie3.mpg
- Movie4.mpg
- polymers-158299-supplementary.pdf
